# Supplementary material
Source: publisher site journal article supplement (https://www.dovepress.com/article/288728)
Supplement: Supplementary file 1 [file get_supplementary_file.php]

**Supplementary Figures**

**
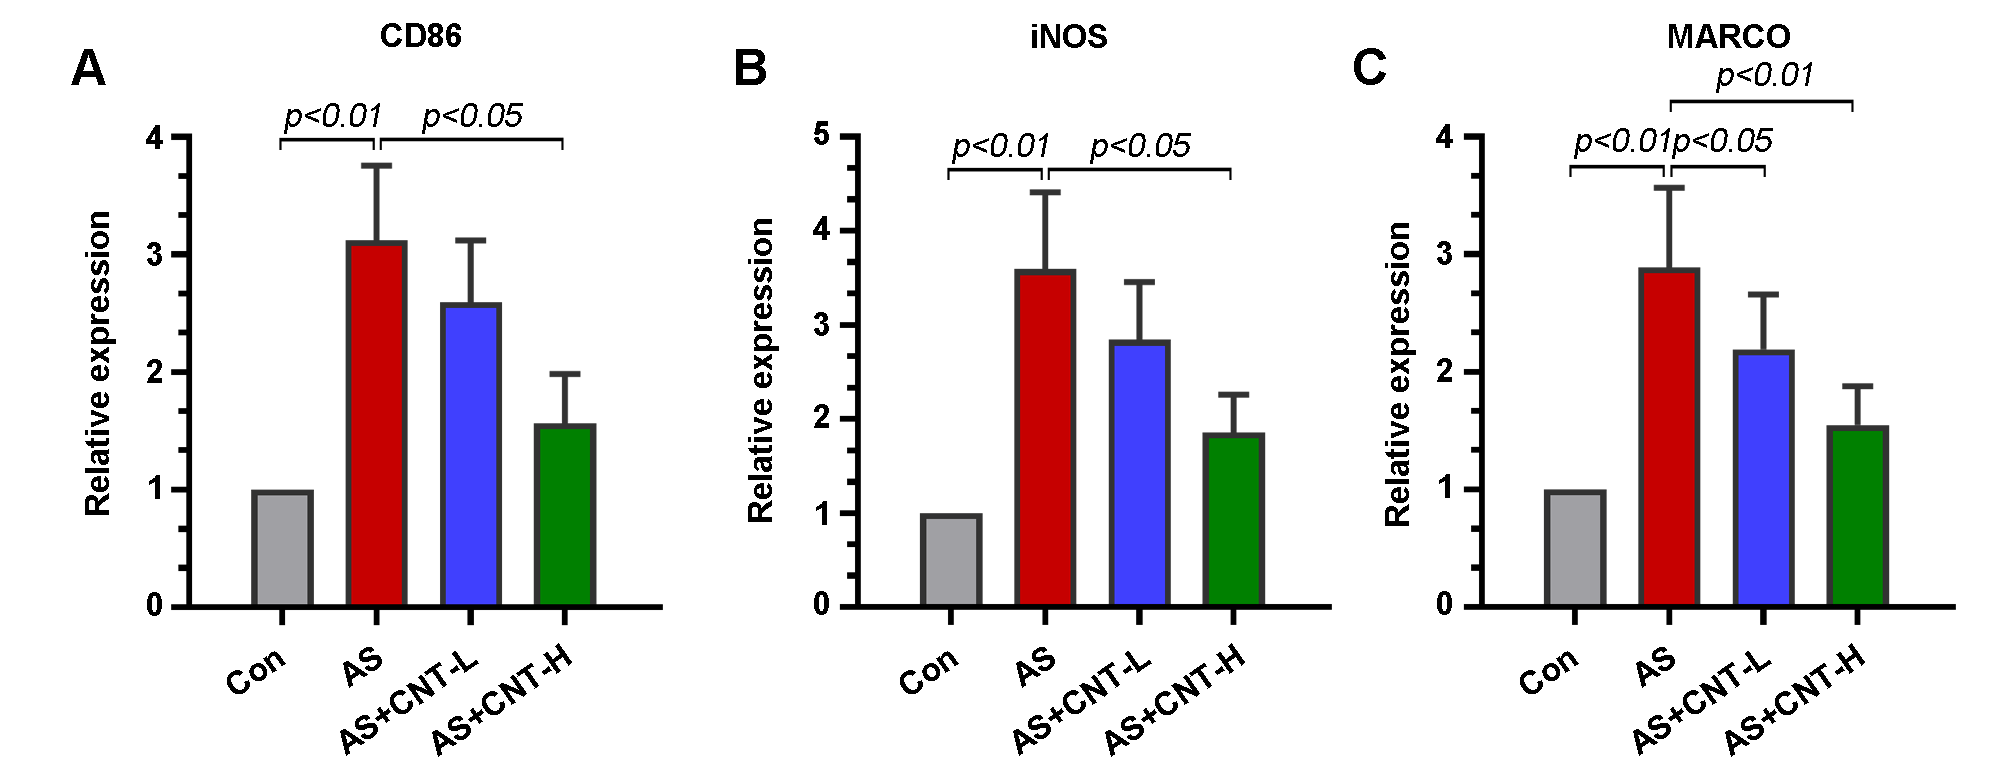
**

**Supplementary Figure 1. CNT attenuated M1 macrophage polarization *in vivo*.**

**(A-C)** qPCR analysis of the relative expressions of M1 markers in aortic tissues of mice, including CD86, iNOS and MARCO. Data were expressed as mean ± SD. AS: atherosclerosis; CNT-L: low dose of CNT; CNT-H: high dose of CNT.


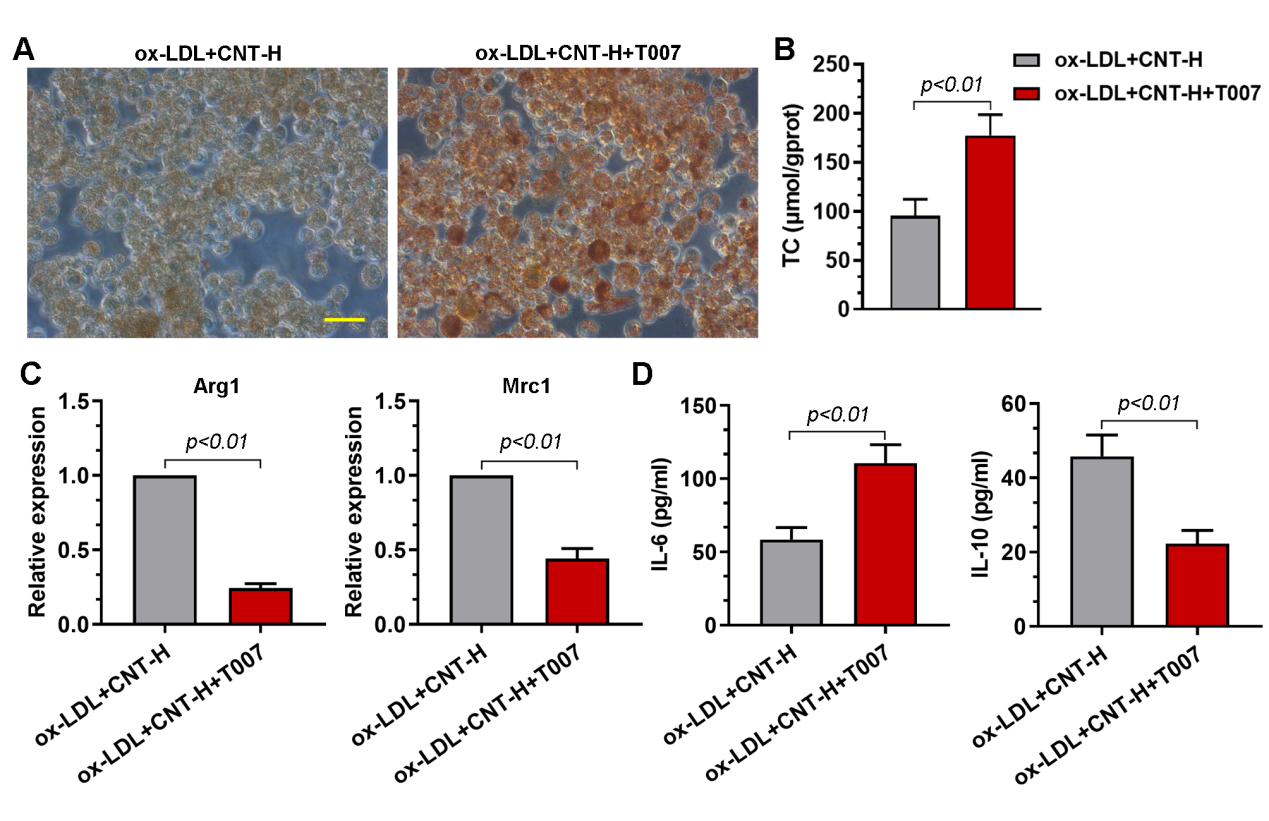


**Supplementary Figure 2. PPARγ antagonist, T0070907, inhibited CNT-induced M2 macrophage polarization.**

**(A)** Representative images of Oil red O staining in RAW264.7 cells. Bar=50 μm. **(B)** TC levels in macrophages were detected. **(C)** Relative mRNA expressions of Arg1 and Mrc1 in RAW264.7 cells were measured. **(D)** Levels of IL-6 and IL-10 were determined in cell supernatants. Data were expressed as mean ± SD. CNT-H: high dose of CNT; T007: T0070907.
